# Supplementary material for: Does polysaccharide glycogen behave as a promoter of amyloid fibril formation at physiologically relevant concentrations?
Source: Royal Society of Chemistry journal article supplement (doi:10.1039/d0sm01884h), 2020-12-10
Supplement: d0sm01884h1.pdf [file d0sm01884h1.pdf]

# Does polysaccharide glycogen behave as a promoter of amyloid fibril formation at physiologically relevant concentrations?

Monika Holubová<sup>a,b</sup>, Volodymyr Lobaz<sup>a</sup>, Lenka Loukotová<sup>a</sup>, Mariia Rabyk<sup>a</sup>, Jiřina Hromádková<sup>a</sup>, Olga Trhlíková<sup>a</sup>, Zdislava Pechrová<sup>a</sup>, Ondřej Groborz<sup>a,b</sup>, Petr Štěpánek<sup>a</sup>, Martin Hrubý<sup>a,\*</sup>

<sup>a</sup>Institute of Macromolecular Chemistry, Academy of Sciences of the Czech Republic, Heyrovský Sq. 2, 162 06 Prague 6, Czech Republic, e-mail address: mhruby@centrum.cz

<sup>b</sup>Charles University in Prague, Faculty of Science, Albertov 6, 128 43 Prague 2, Czech Republic

## Supplementary information:

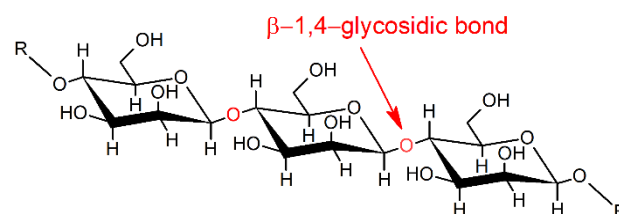

Fig. S1. Structure of mannan (MAN).

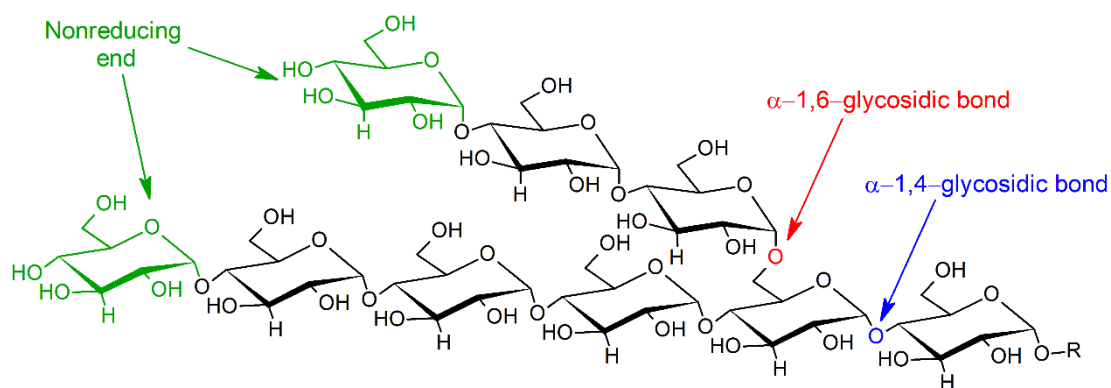

Fig. S2. Structure of glycogen (GG).

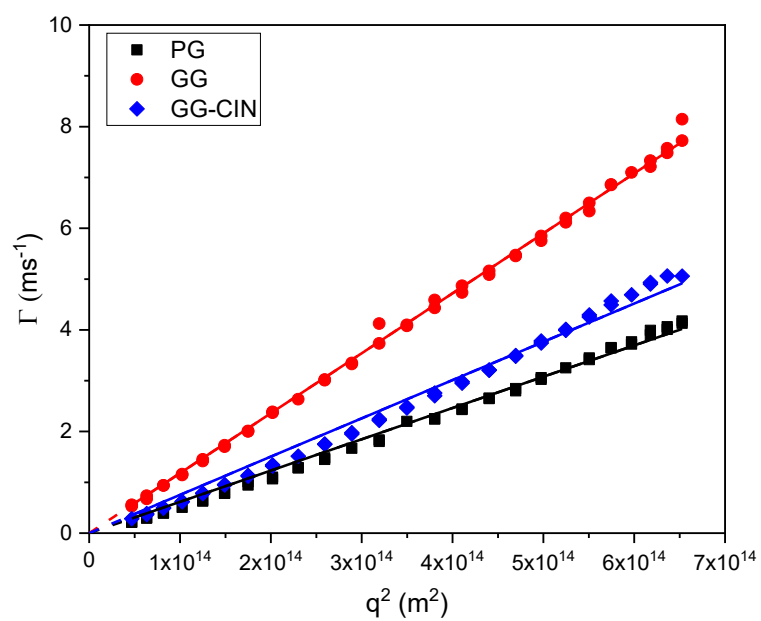

Fig. S3 The graph of  $\Gamma$  dependence on  $q^2$

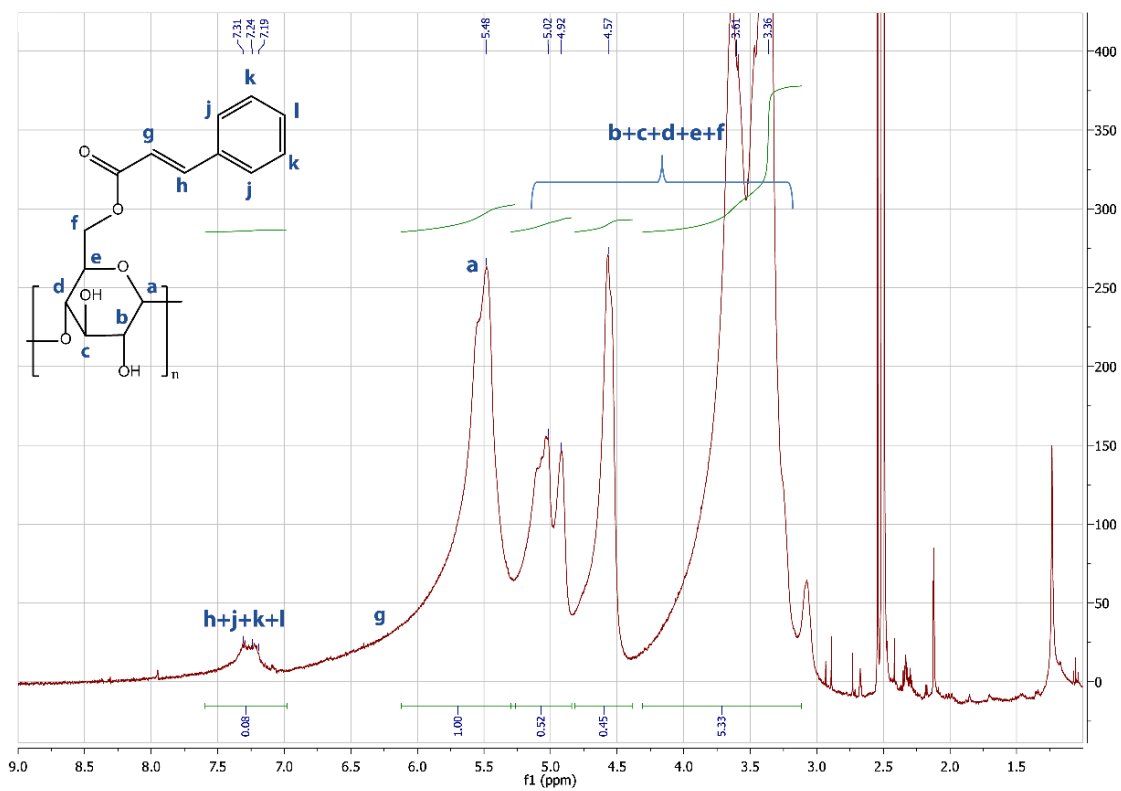

Fig. S4. <sup>1</sup>H-NMR of cinnamoylated glycogen (GG-CIN).

Tab. S1. The refractive index increment ( $dn/dc$ ), molecular weight ( $M_w$ ) and intensity-weighted  $R_h$  values obtained from DLS of all polysaccharides and GG-CIN.

|                               | <i>MAN</i>          | <i>GG</i>           | <i>PG</i>            | <i>GG-CIN</i>       |
|-------------------------------|---------------------|---------------------|----------------------|---------------------|
| $dn/dc$ (mL/g)                | 0.1355±0.0039       | 0.1483±0.0017       | 0.1471±0.0002        | 0.1505±0.0019       |
| $M_w$ (g/mol)                 | 5.5×10 <sup>4</sup> | 5.7×10 <sup>6</sup> | 27.1×10 <sup>6</sup> | 6.1×10 <sup>6</sup> |
| Intensity-weighted $R_h$ (nm) | 5.9±1.5             | 23.5±8.1            | 45.1±19.9            | 30.4±19.0           |

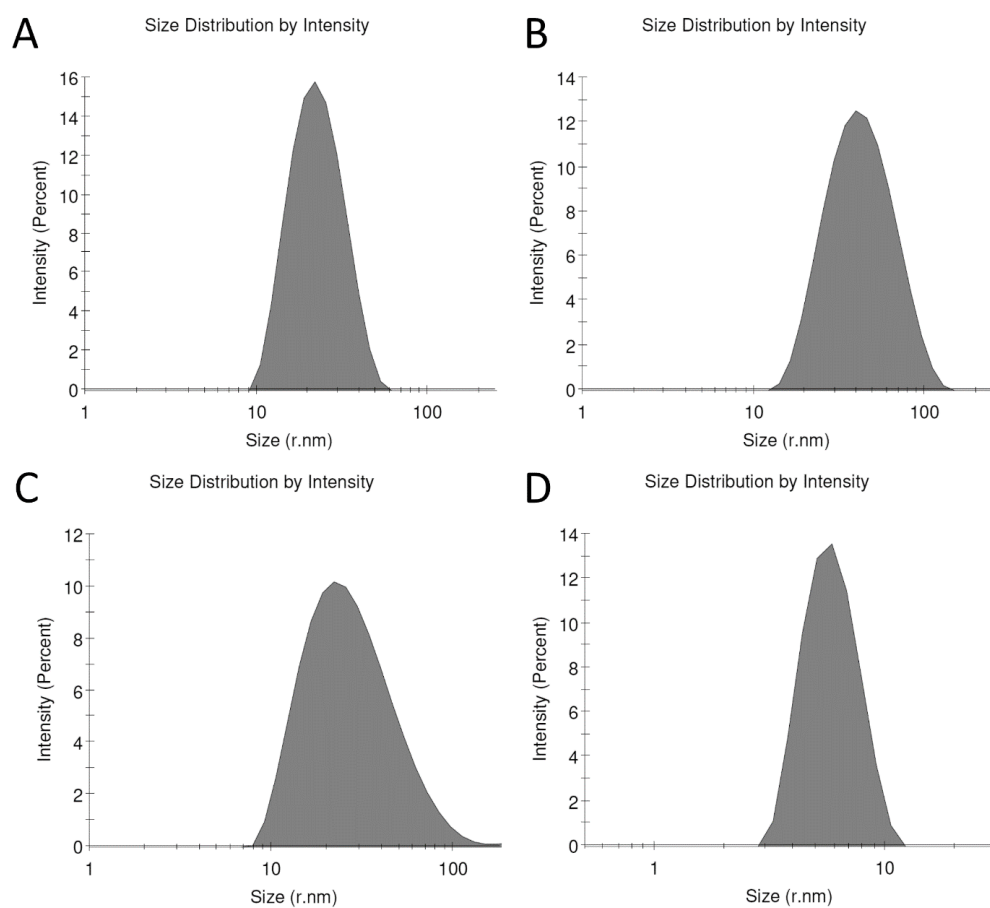

Fig. S5. Size distribution by intensity for (A) GG, (B) PG, (C) GG-CIN and (D) MAN.

## Experiments with HEWL, MAN, GG and PG

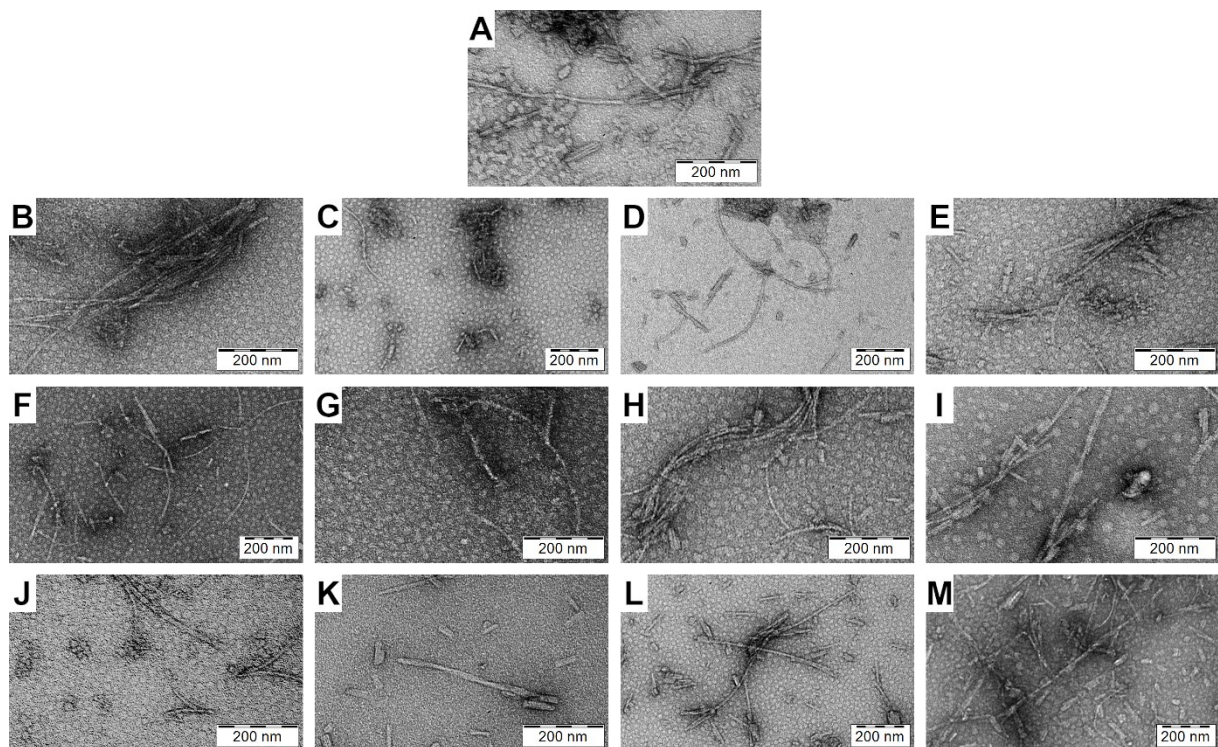

Fig. S6. Experiments with HEWL, MAN, GG and PG: TEM micrographs after 24h: (A) shorter and longer fibrils of HEWL (control) without any polysaccharides; shorter and longer fibrils for samples containing (B) 10  $\mu\text{g/mL}$ , (C) 50  $\mu\text{g/mL}$ , (D) 250  $\mu\text{g/mL}$  and (E) 500  $\mu\text{g/mL}$  MAN; shorter and longer fibrils for samples containing (F) 10  $\mu\text{g/mL}$ , (G) 50  $\mu\text{g/mL}$ , (H) 250  $\mu\text{g/mL}$  and (I) 500  $\mu\text{g/mL}$  GG; shorter and longer fibrils for samples containing (J) 10  $\mu\text{g/mL}$ , (K) 50  $\mu\text{g/mL}$ , (L) 250 PG  $\mu\text{g/mL}$  and (M) 500  $\mu\text{g/mL}$  PG. The TEM micrographs were used just to illustrate and check the morphology.

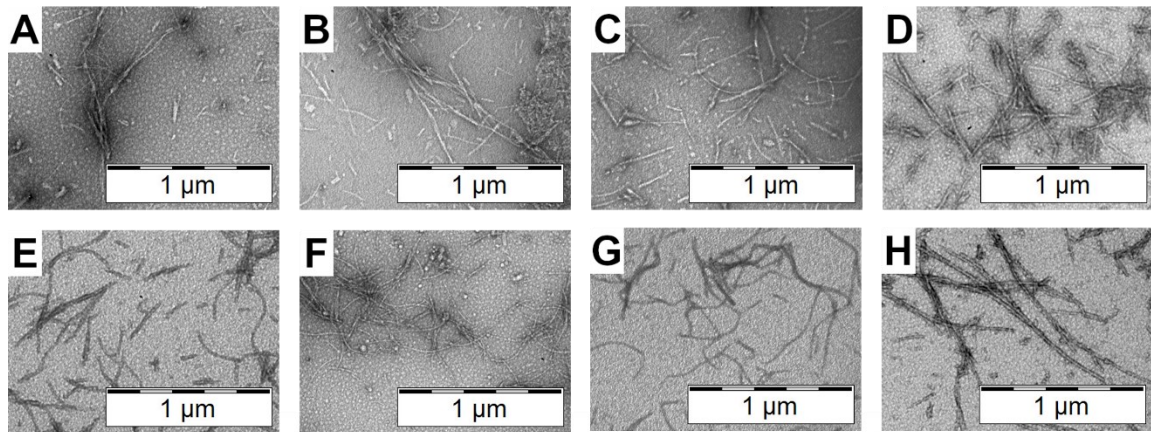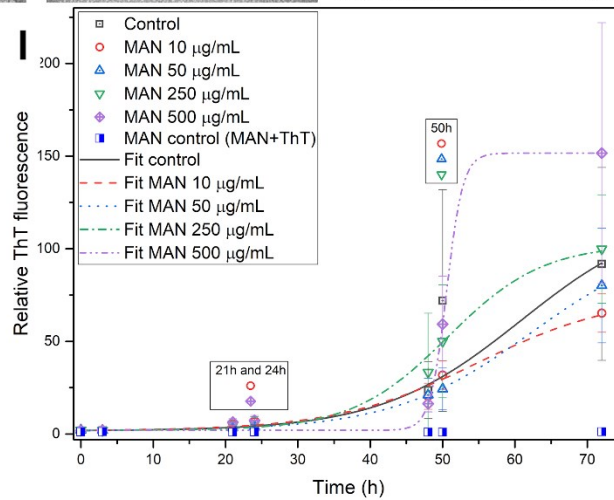

Fig. S7 Experiments with HEWL, MAN, GG and PG: TEM micrographs after 48h: (A-D) shorter and longer fibrils for samples containing (A) 10 µg/mL, (B) 50 µg/mL, (C) 250 µg/mL and (D) 500 µg/mL MAN; (E) and (F) shorter and longer fibrils for samples containing 10 µg/mL and 50 µg/mL GG; (G) shorter and longer fibrils for the sample containing 10 µg/mL PG; (H) shorter and long fibers for the sample containing 50 µg/mL PG. (I) Graphs of relative ThT fluorescence with the fit of data. The legend above the results from the same time represents a statistically significant difference ( $\alpha < 0.05$ ) when compared to control at this time. The TEM micrographs were used just to illustrate and check the morphology.

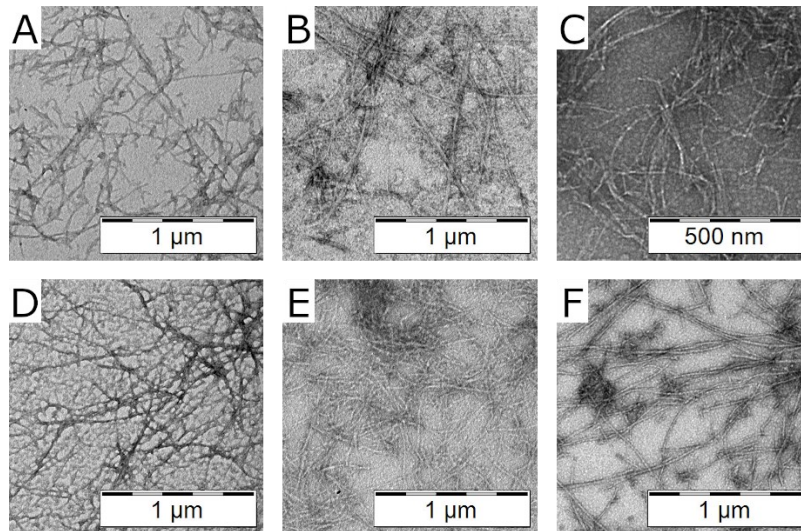

Fig. S8. Experiments with HEWL, MAN, GG and PG: TEM micrographs after 72 h: (A) mature amyloid fibrils of HEWL (control) without any polysaccharides; (B) mature amyloid fibrils of 250  $\mu\text{g}/\text{mL}$  MAN; (C) and (D) mature amyloid fibrils for samples containing 10  $\mu\text{g}/\text{mL}$  and 50  $\mu\text{g}/\text{mL}$  GG; (E) and (F) mature amyloid fibrils for samples containing 10  $\mu\text{g}/\text{mL}$  and 50  $\mu\text{g}/\text{mL}$  GG. The TEM micrographs were used just to illustrate and check the morphology.

**Experiment with HEWL, GG and GG-CIN**

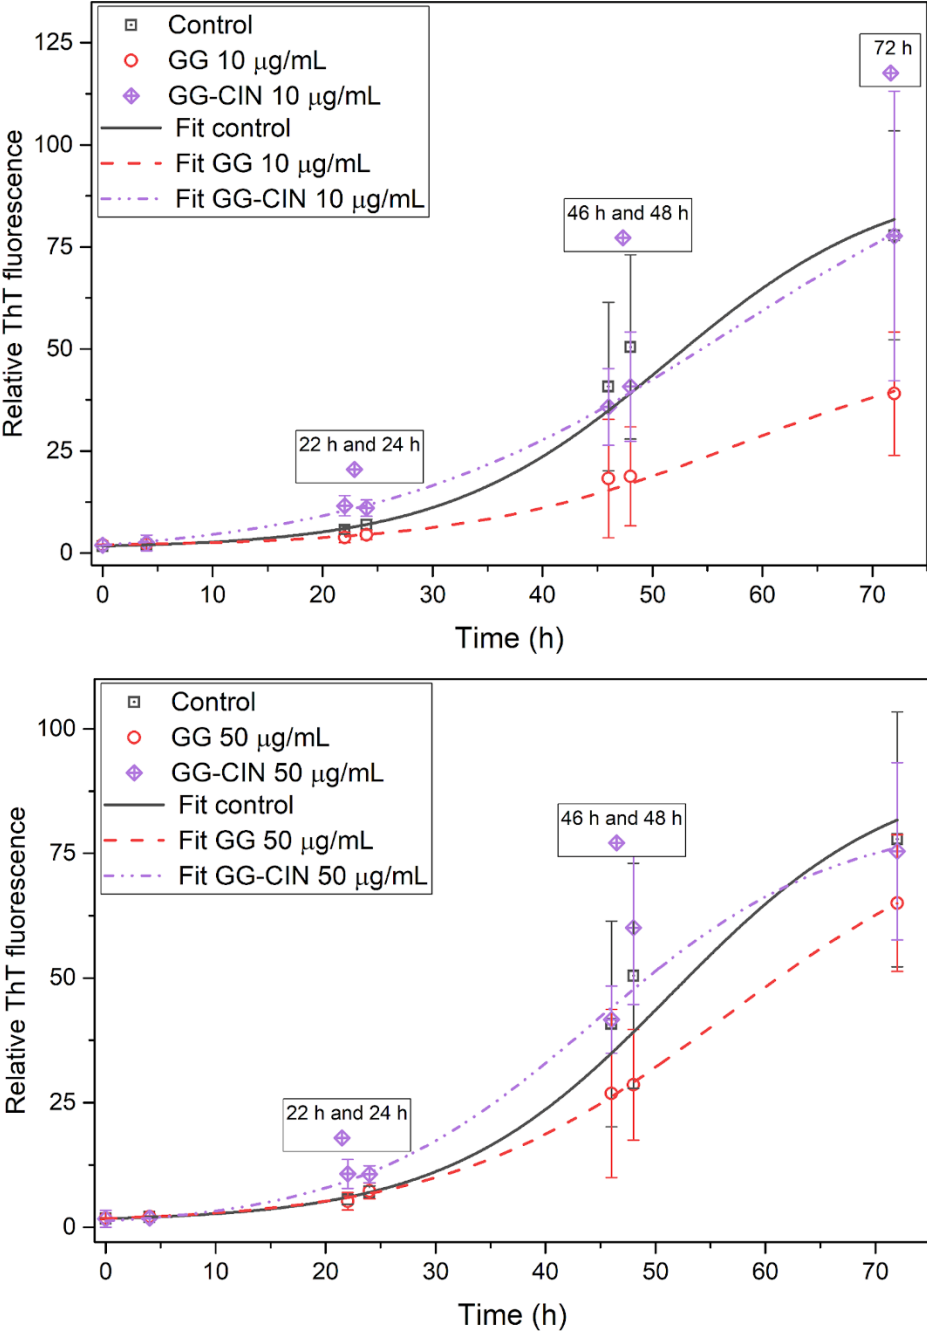

Fig. S9 part A. Experiments with HEWL, GG and GG-CIN: The graphs of comparison same amount unmodified GG and GG-CIN. The legend above the results at the same time represents a statistically significant difference ( $\alpha < 0.05$ ) when GG-CIN was compared to GG at this time.

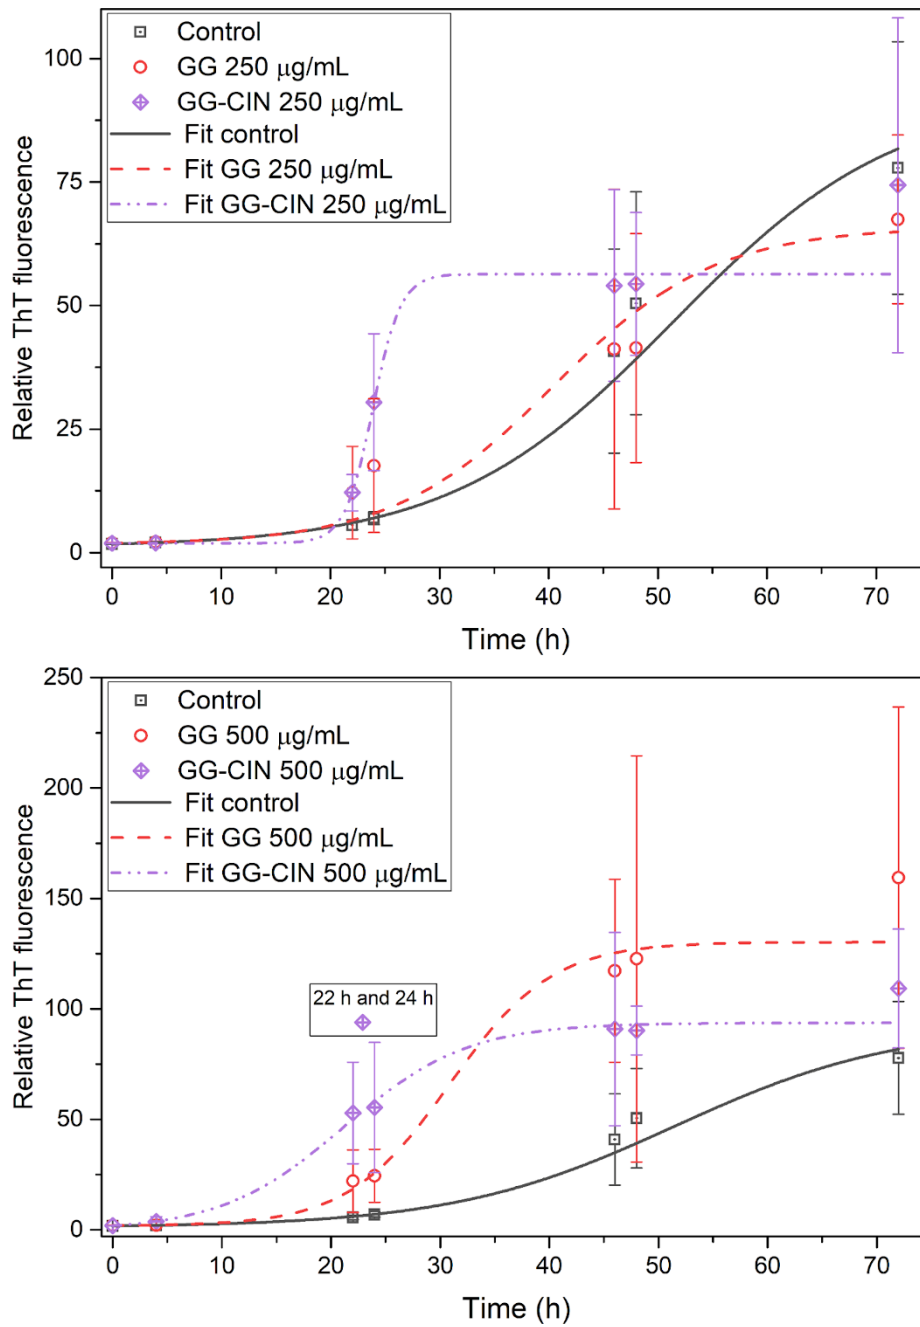

Fig. S9 part B. Experiments with HEWL, GG and GG-CIN: The graphs of comparison same amount unmodified GG and GG-CIN. The legend above the results at the same time represents a statistically significant difference ( $\alpha < 0.05$ ) when GG-CIN was compared to GG at this time.



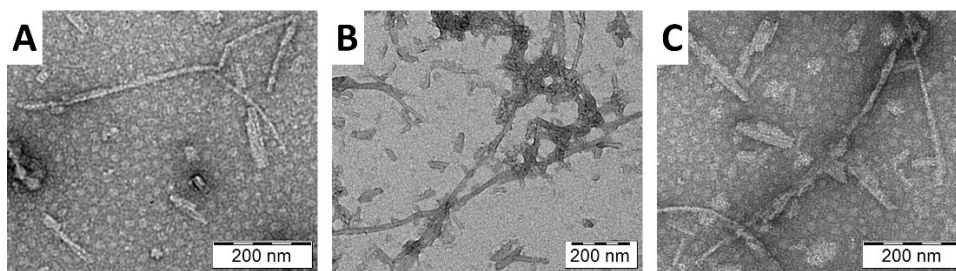

Fig. S10. Experiments with HEWL, GG and GG-CIN: TEM micrographs after 24h incubation: shorter and longer fibrils for samples containing (A) 10  $\mu\text{g/mL}$ , (B) 50  $\mu\text{g/mL}$  and (C) 250  $\mu\text{g/mL}$  GG-CIN. The TEM micrographs were used just to illustrate and check the morphology.

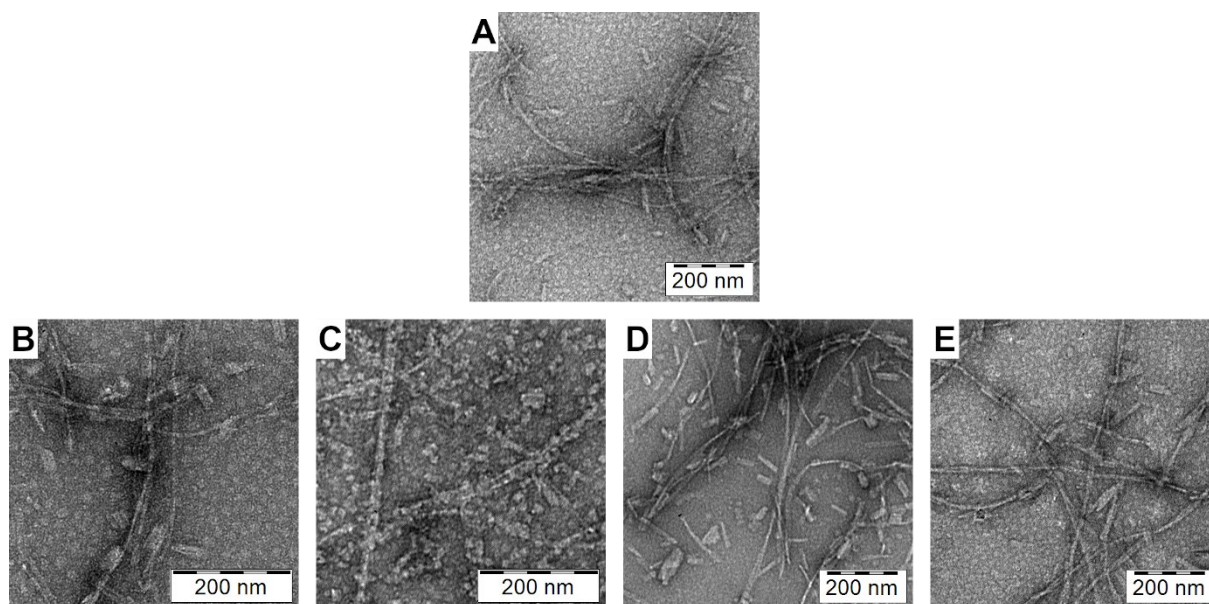

Fig. S11. Experiments with HEWL, GG and GG-CIN: TEM micrographs after 48h incubation: (A) shorter and longer fibrils of HEWL (control); (B) shorter and longer fibrils for the sample containing 10  $\mu\text{g/mL}$  GG-CIN, (C) longer fibrils for the sample containing 50  $\mu\text{g/mL}$  GG-CIN, (D) many shorter fibrils and some longer fibrils for the sample containing 250  $\mu\text{g/mL}$  GG-CIN, (E) long mature fibrils for the sample containing 500  $\mu\text{g/mL}$  GG-CIN. The TEM micrographs were used just to illustrate and check the morphology.

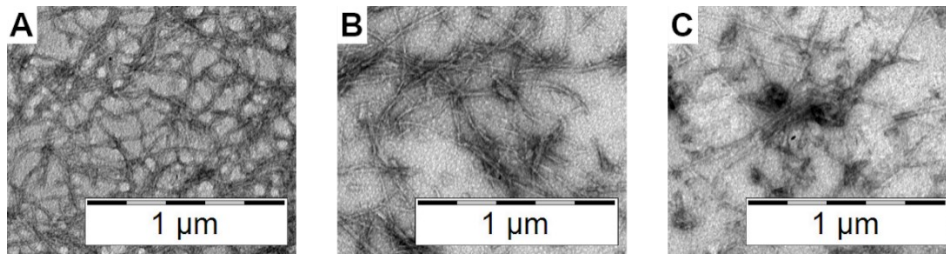

Fig. S12. Experiments with HEWL, GG and GG-CIN: TEM micrographs after 72 h incubation: (A) long mature fibrils of HEWL (control); (B) long mature fibrils and some shorter fibrils of samples containing 10 µg/mL GG-CIN, (C) long mature fibrils and some shorter fibrils of samples containing 250 µg/mL GG-CIN. The TEM micrographs were used just to illustrate and check the morphology.

### Experiment with biologically relevant concentrations of GG

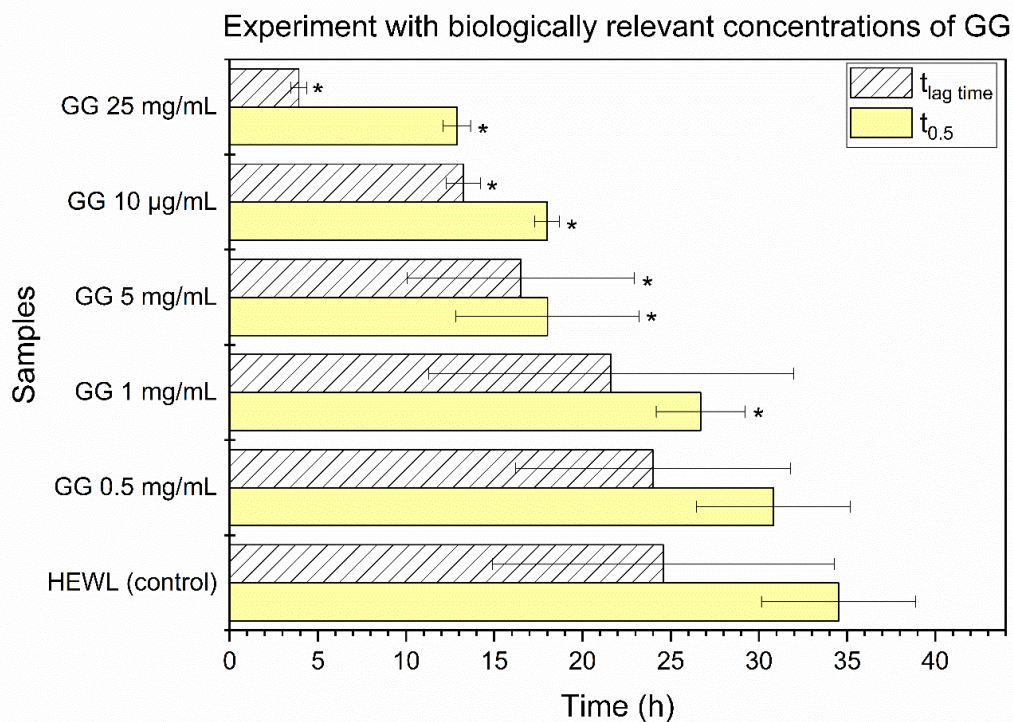

Fig. S13 The graph of the lag times ( $t_{lag\ time}$ ) and times ( $t_{0.5}$ ) at 50% maximal fluorescence for experiments with high concentrations of GG. The star (\*) means a statistically significant difference ( $\alpha < 0.05$ ) when compared to the control.

## Experiment for $A\beta_{1-42}$ , MAN, PG, GG-CIN and GG.

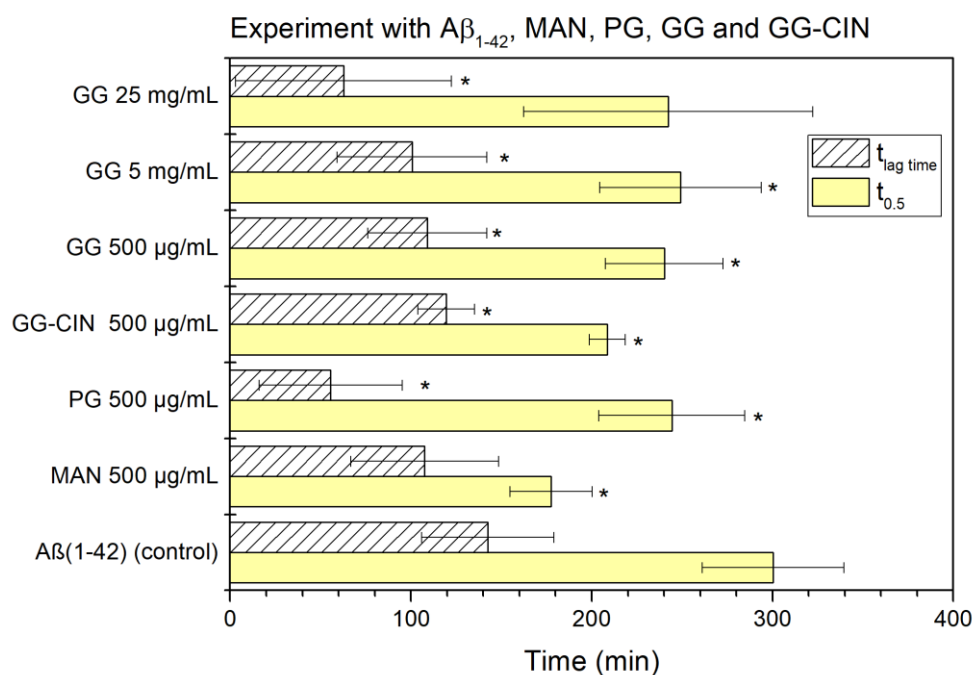

Fig. S14 A graph of the lag times ( $t_{lag\ time}$ ) and times ( $t_{0.5}$ ) at 50% maximal fluorescence for experiments of  $A\beta_{1-42}$  fibril formation without and with polysaccharides. The star (\*) means a statistically significant difference ( $\alpha < 0.05$ ) when compared to the control.

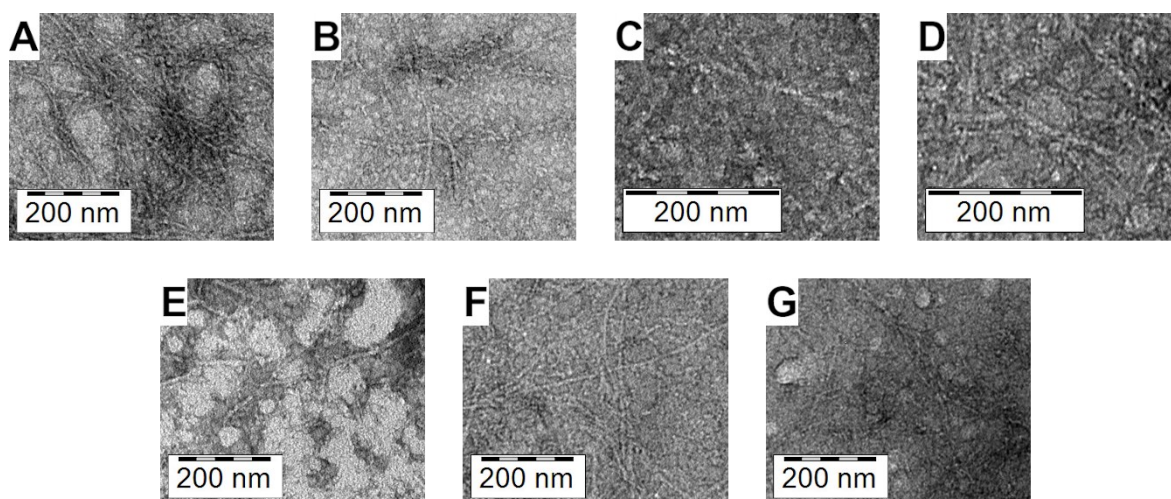

Fig. S15. TEM micrographs after 26 h incubation: (A) fibrils of  $A\beta_{1-42}$  (control); (B) hint of fibrils of the sample containing 500  $\mu$ g/mL PG, (C) hint of fibrils of the sample containing 500  $\mu$ g/mL MAN, (D) hint of fibrils of the sample containing 500  $\mu$ g/mL GG-CIN; a hint of fibrils the sample containing (E) 500  $\mu$ g/mL, (F) 5 mg/mL and (G) 25 mg/mL GG. The TEM micrographs were used just to illustrate and check morphology.

**Isothermal titration calorimetry (ITC)** – the upper graph – heat flow per injection corrected to the heat of dilution, lower graph – integrated heat vs molar ratio (the line is a fit to the experimental data)

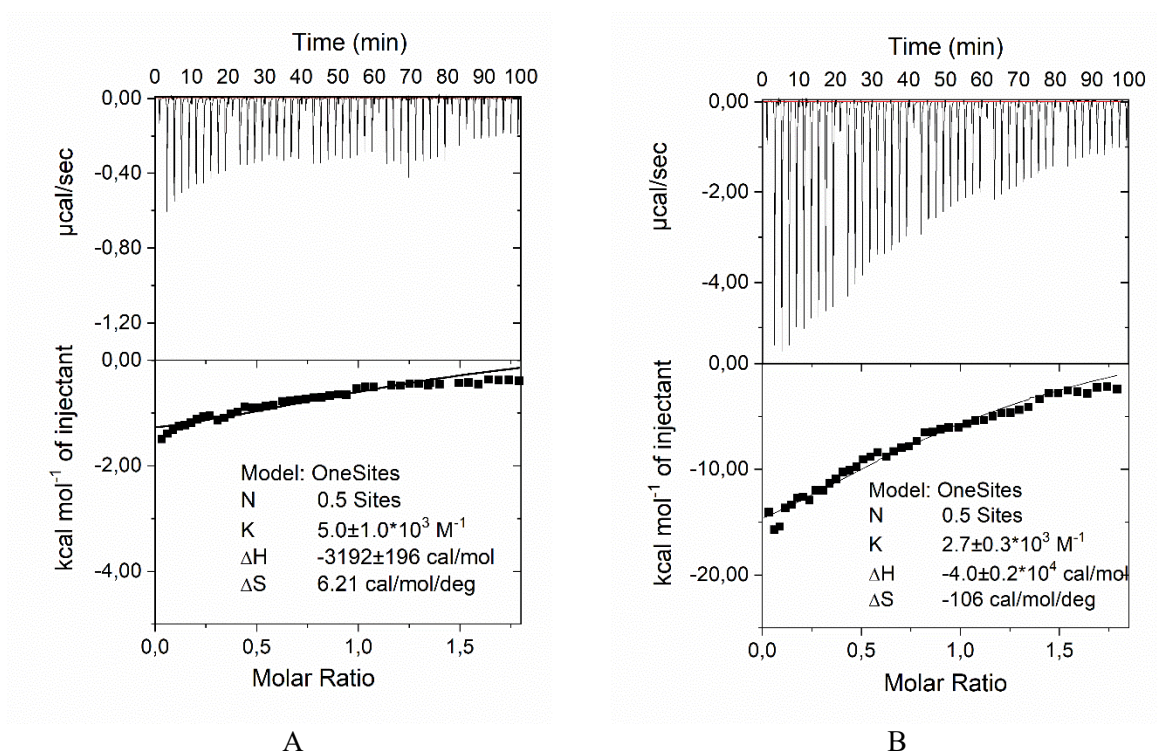

Fig.S16 Titration of 1mM HEWL with 1.35mM MAN at 25°C (A) and 57°C (B).

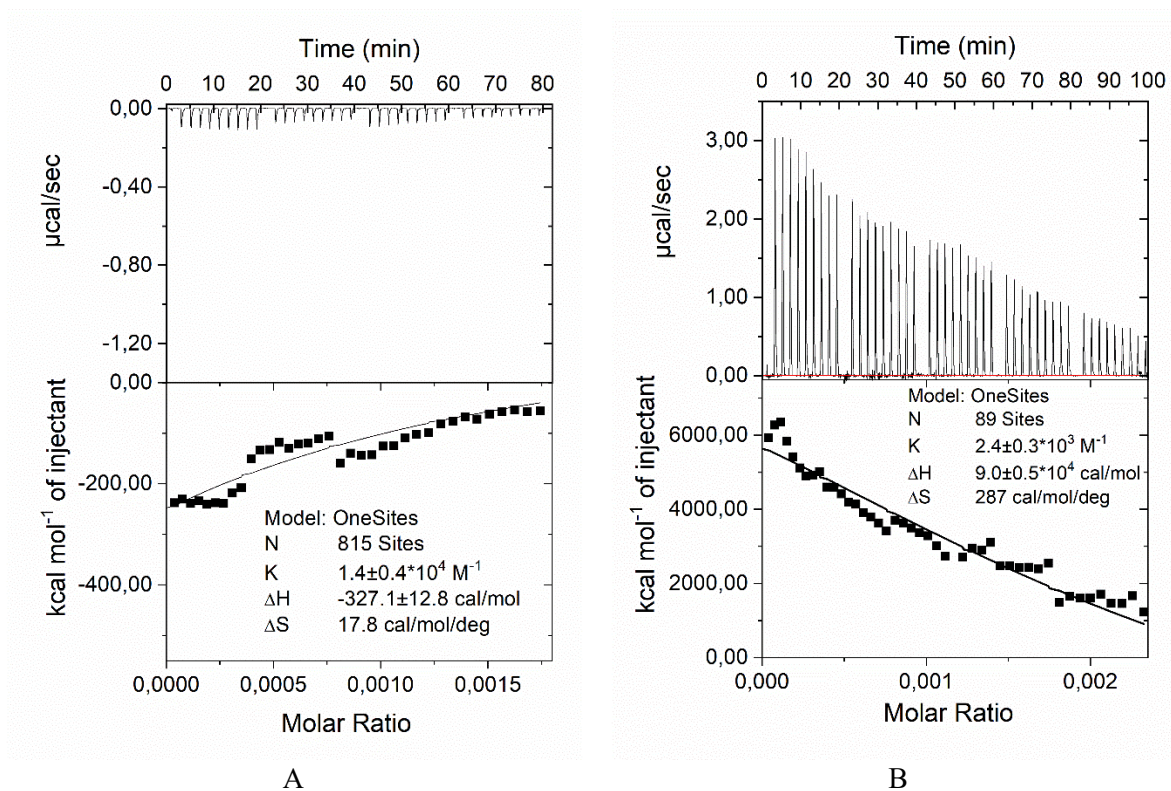

Fig.S17 Titration of 1mM HEWL with 2.76  $\mu\text{M}$  PG at 25°C (A) and 57°C (B).

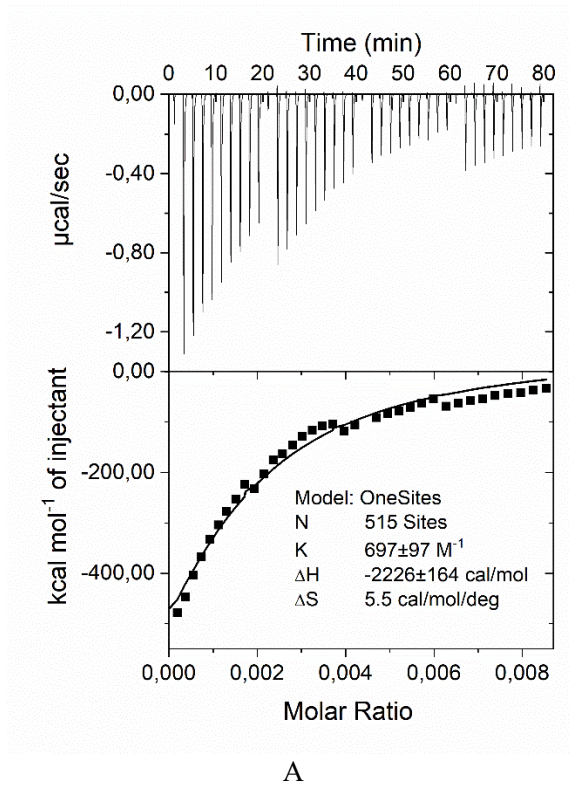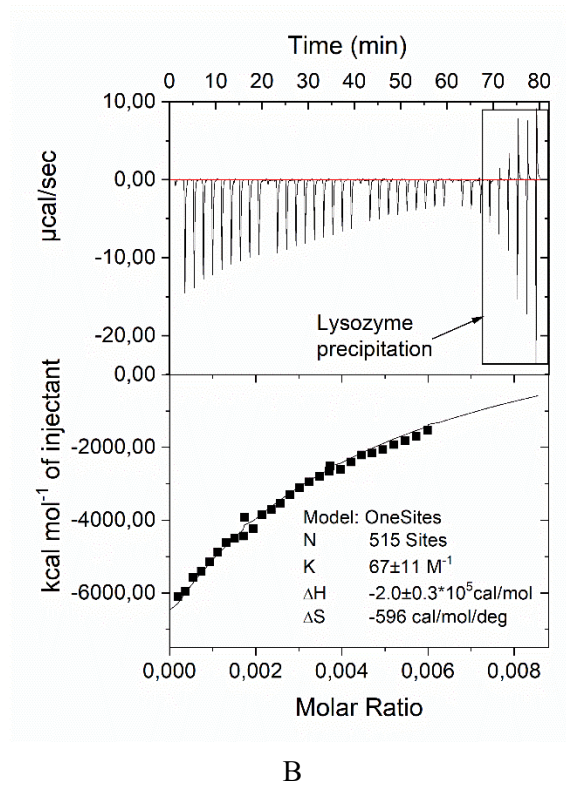

Fig.S18 Titration of 1mM HEWL with 8.83 µM GG at 25°C (A) and 57°C (B).

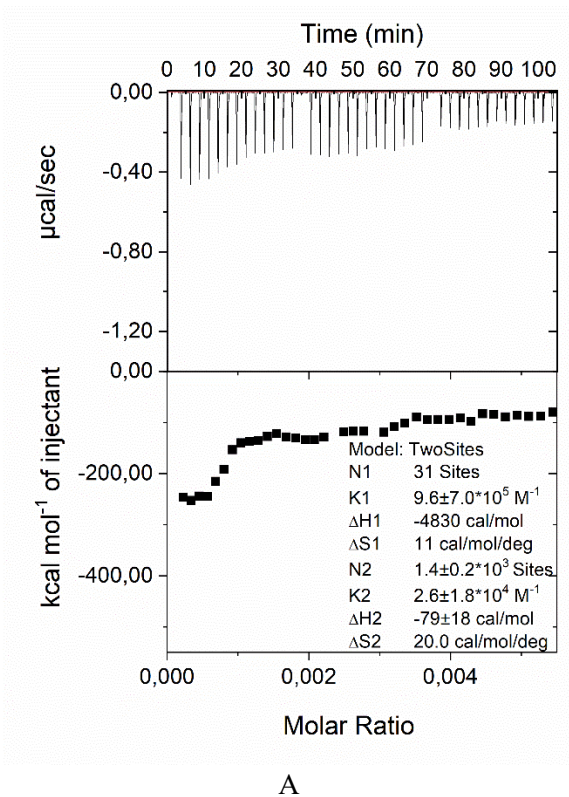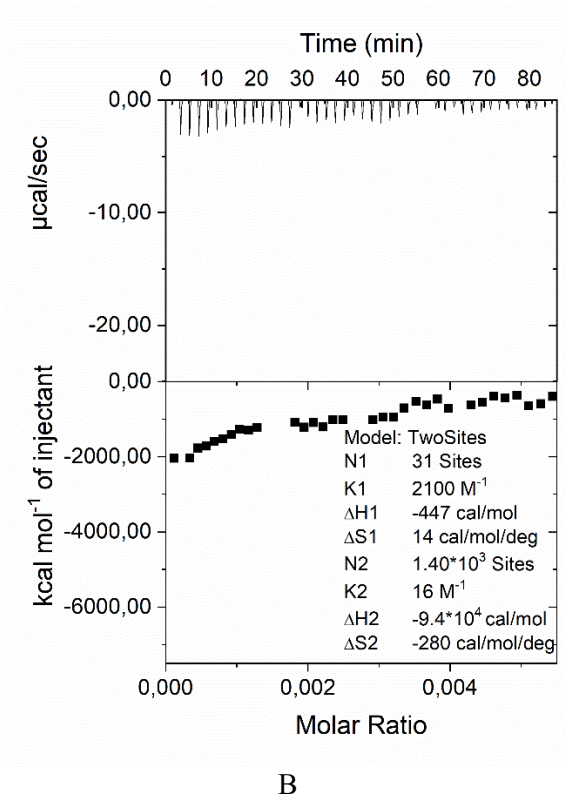

Fig.S19 Titration of 1mM HEWL with 7.26 µM GG-CIN at 25°C (A) and 57°C (B).

Tab. S2 Intensity  $R_h$  of polymers at temperatures of 25 °C and 57 °C and their corresponding relative excluded volume and density.

|        |                                 | 25 °C         |                          |                                        | 57 °C         |                          |                                        |
|--------|---------------------------------|---------------|--------------------------|----------------------------------------|---------------|--------------------------|----------------------------------------|
|        | <i>concentration</i><br>(mg/mL) | $R_h$<br>(nm) | <i>Density</i><br>(g/mL) | <i>Relative excluded volume</i><br>(%) | $R_h$<br>(nm) | <i>Density</i><br>(g/mL) | <i>Relative excluded volume</i><br>(%) |
| GG     | 0.5                             | 23.5          | 0.174                    | 0.29                                   | 20.6          | 0.259                    | 0.19                                   |
|        | 1                               |               |                          | 0.58                                   |               |                          | 0.39                                   |
|        | 5                               |               |                          | 2.87                                   |               |                          | 1.93                                   |
|        | 10                              |               |                          | 5.74                                   |               |                          | 3.87                                   |
|        | 25                              |               |                          | 14.36                                  |               |                          | 9.67                                   |
| MAN    | 0.5                             | 5.9           | 0.106                    | 0.47                                   | 6.2           | 0.091                    | 0.55                                   |
| PG     | 0.5                             | 45.1          | 0.118                    | 0.43                                   | 38.2          | 0.193                    | 0.26                                   |
| GG-CIN | 0.5                             | 30.4          | 0.086                    | 0.58                                   | 27.7          | 0.113                    | 0.44                                   |
